# Supplementary material
Source: PubMed Central journal article supplement (PMC3847577)
Supplement: cr2013149x1.pdf [file cr2013149x1.pdf]

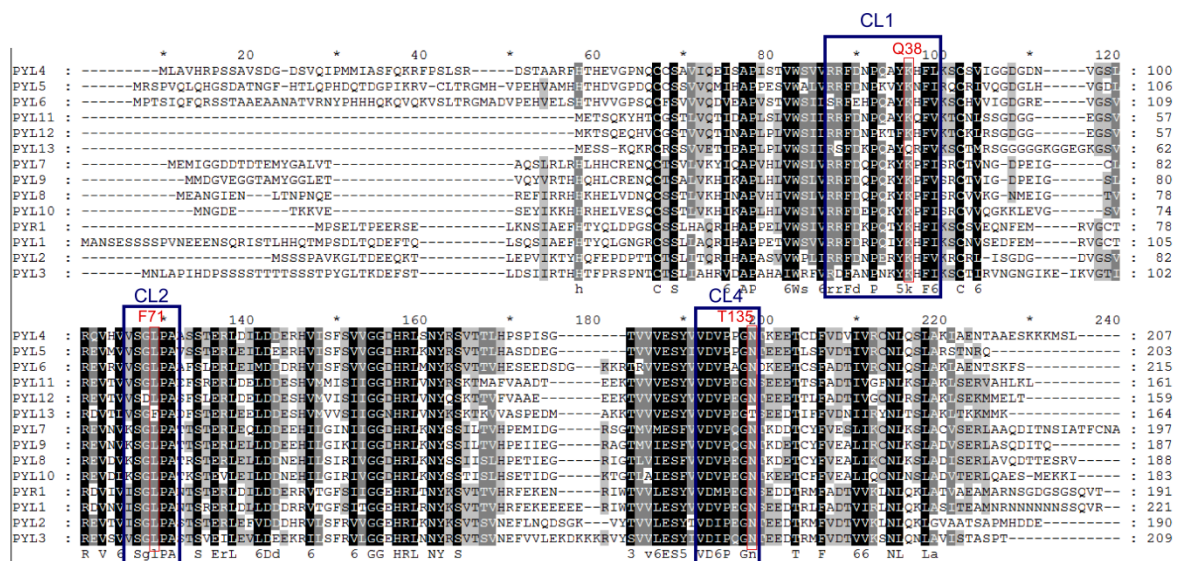

**Supplementary information, Figure S1** PYL13 differs from other PYLs in critical residues. The residues Q38, F71, and T135 are different in PYL13 (indicated by red rectangular boxes) than in other PYLs in *Arabidopsis*. Q38 is located in conserved loop (CL) 1, F71 is located in CL2, and T135 is located in CL4. These conserved loops (indicated by blue rectangular boxes) are important for ABA-binding, dimer formation of PYLs, and interaction of PYL with PP2C [8]. PYLs from *Arabidopsis* were aligned using ClustalX 2.0.5 [49] with the default settings and were viewed using the GeneDoc software (<http://www.nrbsc.org/gfx/genedoc/>).
