# Supplementary material
Source: PubMed Central journal article supplement (PMC3847577)
Supplement: cr2013149x2.pdf [file cr2013149x2.pdf]

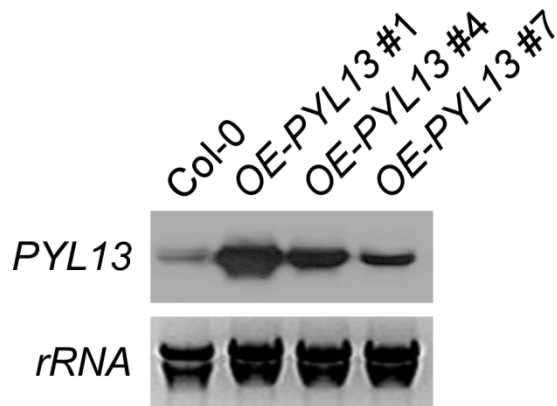

**Supplementary information, Figure S2** Northern blot analysis of *PYL13* expression in the wild type (Col-0) and *PYL13*-over-expression (*OE-PYL13*) lines. Ethidium bromide stained *rRNA* bands are shown as the loading control.
