# Supplementary material
Source: PubMed Central journal article supplement (PMC3847577)
Supplement: cr2013149x3.pdf [file cr2013149x3.pdf]

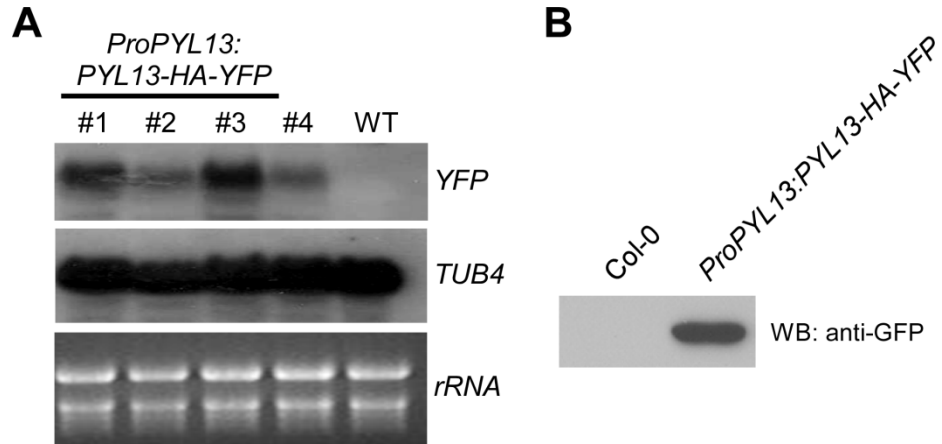

**Supplementary information, Figure S3** Expression of *PYL13-3HA-YFP* in *ProPYL13: PYL13-HA-YFP* transgenic lines. **(A)** Analysis of *YFP* expression in *ProPYL13: PYL13-HA-YFP* lines using Northern blotting. Ethidium bromide stained *rRNA* bands are shown as the loading control. **(B)** Detection of the *PYL13-HA-YFP* protein in a sample purified from floral organs of *ProPYL13: PYL13-HA-YFP*-expressing lines without external ABA using anti-GFP-agarose. *PYL13-HA-YFP* protein was detected with anti-GFP mouse antibodies (Roche).
