# Supplementary material
Source: PubMed Central journal article supplement (PMC3847577)
Supplement: cr2013149x4.pdf [file cr2013149x4.pdf]

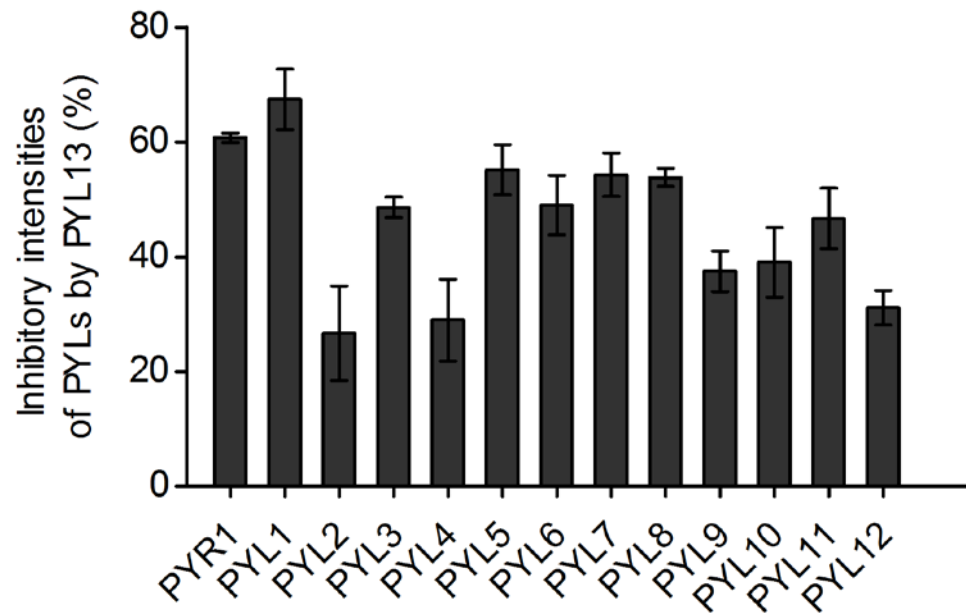

**Supplementary information, Figure S4** Levels of inhibition of PYLs by PYL13. PYL13 can reduce the abilities of other PYLs to inhibit ABI1 activity in wild-type protoplasts. The ABA signaling pathway was reconstituted by co-expression of PYL13, PYLs, ABI1, SnRK2.6, and ABF2. The designation “2xPYL13” indicates that the concentration of PYL13 plasmids was two-fold greater than that of PYL2 plasmids. Error bars indicate SEM. ( $n = 3$ ).
