# Supplementary material
Source: PubMed Central journal article supplement (PMC3847577)
Supplement: cr2013149x5.pdf [file cr2013149x5.pdf]

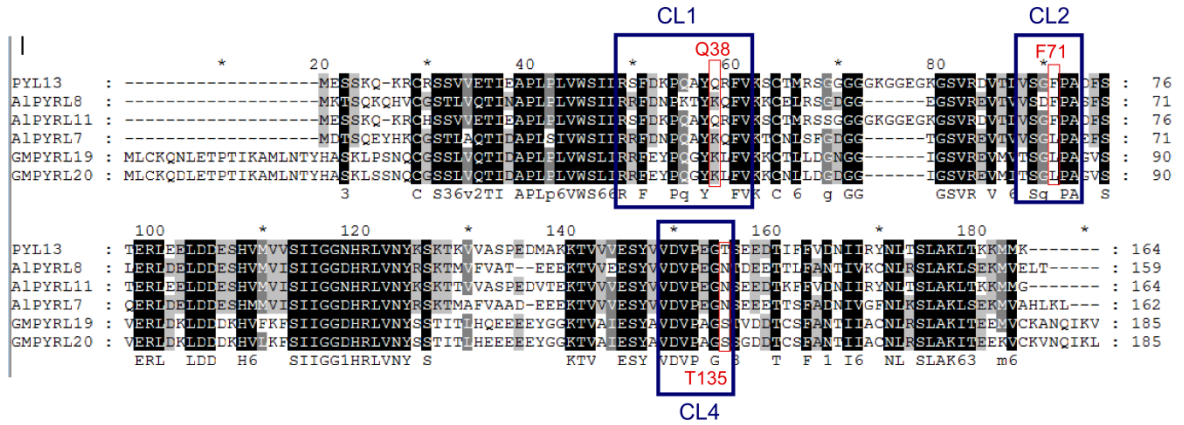

**Supplementary information, Figure S5** The residues Q38, F71, and T135 (indicated by red rectangular boxes) are conserved in *Arabidopsis*. The PYL13 homologs were identified according to the published phylogenetic tree [50], aligned using ClustalX 2.0.5 [49] with the default settings, and viewed using GeneDoc software (<http://www.nrbsc.org/gfx/genedoc/>).
