# Supplementary material
Source: PubMed Central journal article supplement (PMC3847577)
Supplement: cr2013149x6.pdf [file cr2013149x6.pdf]

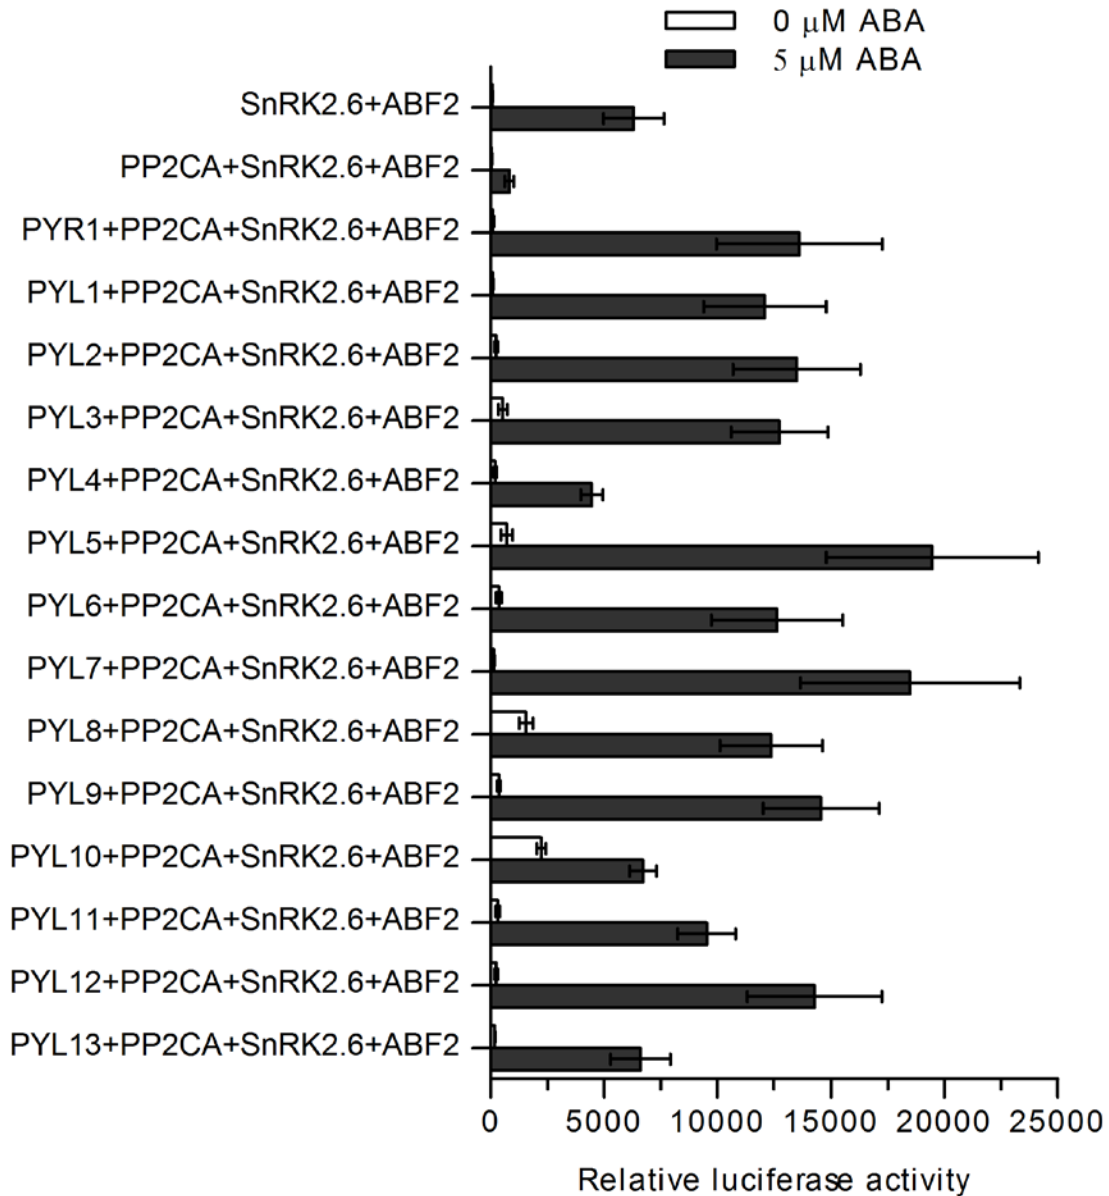

**Supplementary information, Figure S6** ABA-independent inhibition of PP2CA by PYL8 and PYL10 in protoplasts. The ABA signaling pathway was reconstituted by co-expression of PYLs, PP2CA, SnRK2.6, and ABF2. Wild-type (Col-0) protoplasts were used. *RD29B-LUC* was used as the ABA-responsive reporter. *ZmUBQ-GUS* was used as the internal control. After transfection, protoplasts were incubated for 4.5 h under light in the absence of ABA (open bars) or in the presence of 5  $\mu$ M ABA (closed bars). Error bars indicate SEM. ( $n = 8$ ).
