# Supplementary material
Source: PubMed Central journal article supplement (PMC3847577)
Supplement: cr2013149x7.pdf [file cr2013149x7.pdf]

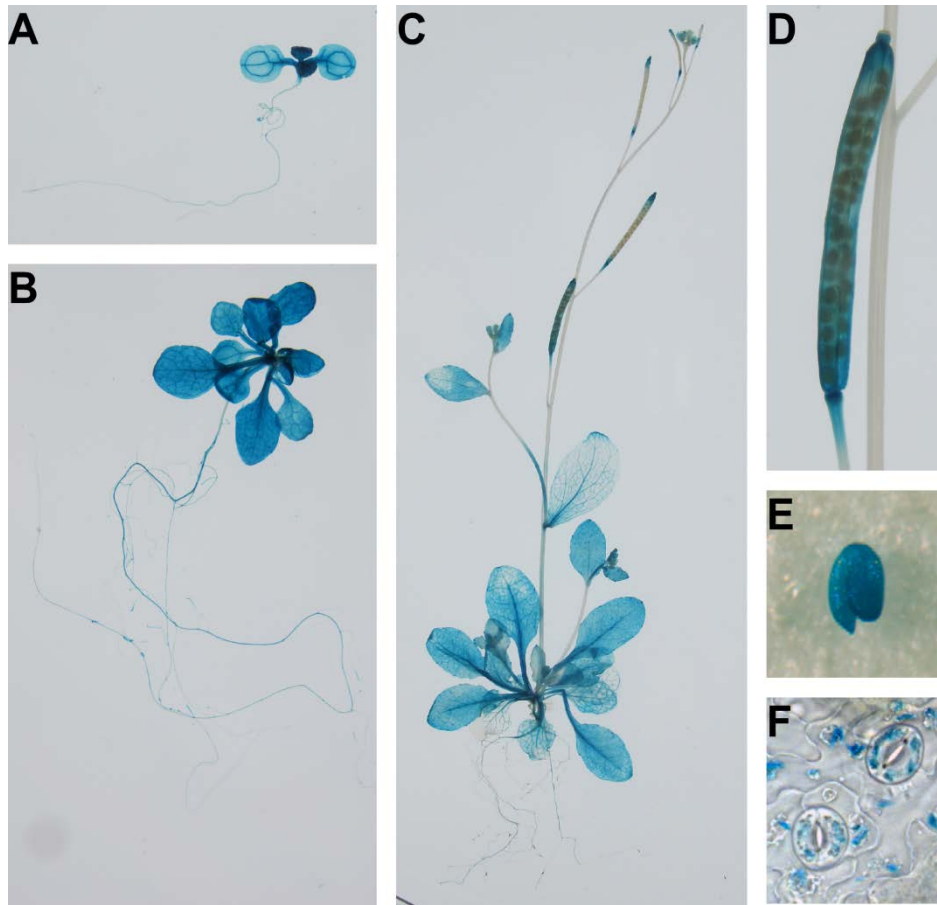

**Supplementary information, Figure S7** Expression pattern of *PYL13* as indicated by the *PYL13 promoter::GUS* reporter. *PYL13 promoter::GUS* expression in 4-day-old seedlings (A), 18-day-old seedlings (B), whole plant (C), siliques (D), imbibed seeds (E), and an epidermal peel (F).
